# Supplementary figures and images for: The Efficacy of Radiotherapy without Surgery for External Auditory Canal Squamous Cell Carcinoma
Source: MDPI journal article supplement (doi:10.3390/jcm11195905), 2022-10-06

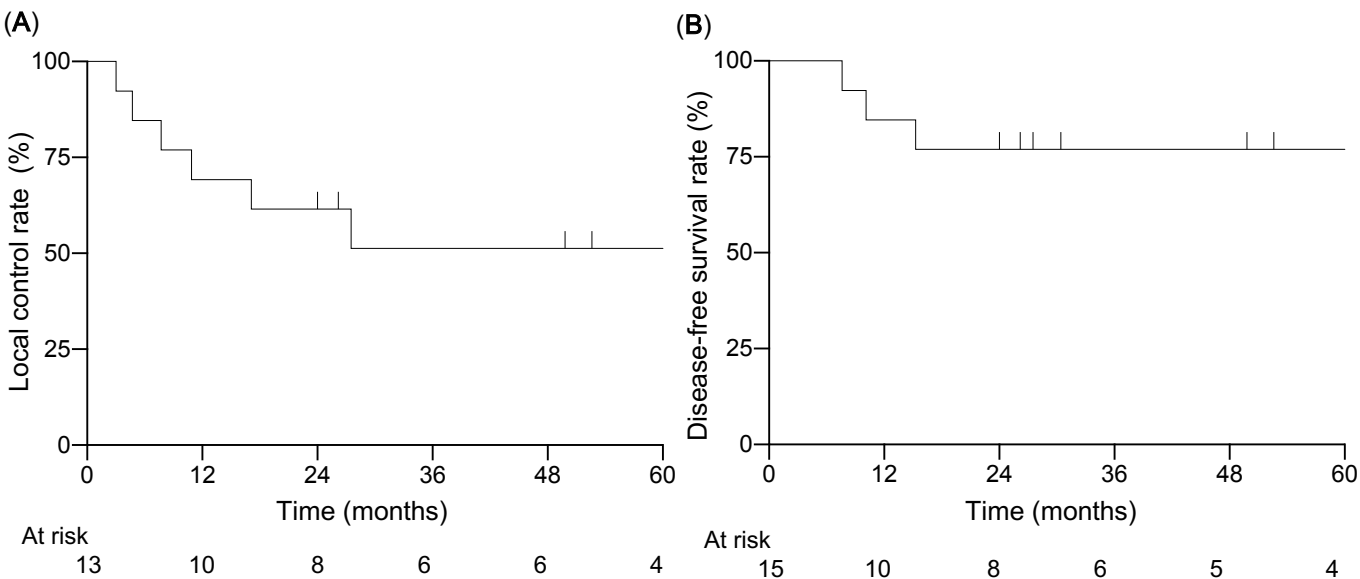

**Supplementary Figure S1.** Kaplan–Meier curves for T2-4 **(A)** local control rate, **(B)** overall survival rate.

Supplement: s1 [file s1]
